# Supplementary material for: Silicone breast implants and the risk of autoimmune/rheumatic disorders: a real-world analysis
Source: Oxford University Press journal article supplement (doi:10.1093/ije/dyy217), 2018-09-19
Supplement: dyy217_supplementary_appendix_table_a.docx [file dyy217_supplementary_appendix_table_a.docx]

**Appendix Table A. Adjusted* odds ratios for autoimmune/rheumatic disorders: results of two sensitivity analyses**

| NO BREAST CANCER HISTORY SBI reciepients in comparison to SBI-free women WITH NO BREAST CANCER HISTORY  (N=95,847) | | | SBI reciepients in the definite category in comparison to SBI-free women  (N=57,475) | | |  |
| --- | --- | --- | --- | --- | --- | --- |
| ***p*- Value** | **95% CI** | **OR *** | ***p*- Value** | **95% CI** | **OR *** | Variable |
| <0.001 | 1.18-1.28 | 1.23 | < 0.001 | 1.16-1.29 | 1.22 | **Any auto-immune disease** |
| 0.298 | 0.83-1.86 | 1.24 | 0.259 | 0.32-1.36 | 0.66 | **Ankylosing spondylitis** |
| <0.001 | 1.29-1.46 | 1.37 | < 0.001 | 1.26-1.50 | 1.37 | **Fibromyalgia/ Chronic fatigue syndrome** |
| <0.001 | 1.08-1.29 | 1.18 | 0.060 | 0.99-1.28 | 1.13 | **Hyperthyroidism** |
| <0.001 | 1.05-1.17 | 1.11 | 0.011 | 1.02- 1.18 | 1.10 | **Hypothyroidism** |
| 0.007 | 1.10-1.83 | 1.42 | 0.005 | 1.16-2.32 | 1.64 | **Multiple sclerosis** |
| <0.001 | 1.06-1.22 | 1.14 | 0.003 | 1.05- 1.29 | 1.17 | **Psoriasis** |
| 0.235 | 0.87-1.72 | 1.23 | 0.424 | 0.75- 1.96 | 1.21 | **Psoriatic arthritis** |
| 0.034 | 1.01-1.40 | 1.19 | 0.350 | 0.89-1.41 | 1.12 | **Rheumatoid arthritis** |
| <0.001 | 1.59-2.91 | 2.15 | 0.002 | 1.27-2.99 | 1.95 | **Sarcoidosis** |
| <0.001 | 1.27-2.05 | 1.62 | 0.005 | 1.15-2.26 | 1.61 | **Sjögren’s syndrome** |
| 0.001 | 1.24-2.17 | 1.64 | 0.163 | 0.89-2.04 | 1.35 | **Systemic sclerosis (Scleroderma)** |
| 0.658 | 0.84-1.32 | 1.05 | 0.860 | 0.74-1.45 | 1.03 | **Systemic lupus erythematosus** |
| 0.261 | 0.82-2.11 | 1.31 | 0.769 | 0.42-1.88 | 0.89 | **Vasculitis**** |
| *****Adjusted for: age (cont.), socio-economic status (low, medium, high), smoking status (never smoked, current/past smoker) and breast cancer history (no, yes).Breast cancer history was not included in the model for women with no breast cancer history.  **Diagnosed with ≥1 of the followings: Takayasu disease, temporal arteritis, Wegener's granulomatosis, Churg-Strauss vasculitis, polyarteritis nodosa | | | | | | |
